# Supplementary material for: Escherichia coli Nissle 1917 Antagonizes Candida albicans Growth and Protects Intestinal Cells from C. albicans-Mediated Damage
Source: MDPI journal article supplement (doi:10.3390/microorganisms11081929), 2023-07-28
Supplement: s1 [file s1]

*Escherichia coli* Nissle 1917 antagonizes *Candida albicans* growth and protects intestinal cells from *C. albicans*-mediated damage

Supplementary Material

Figure S1

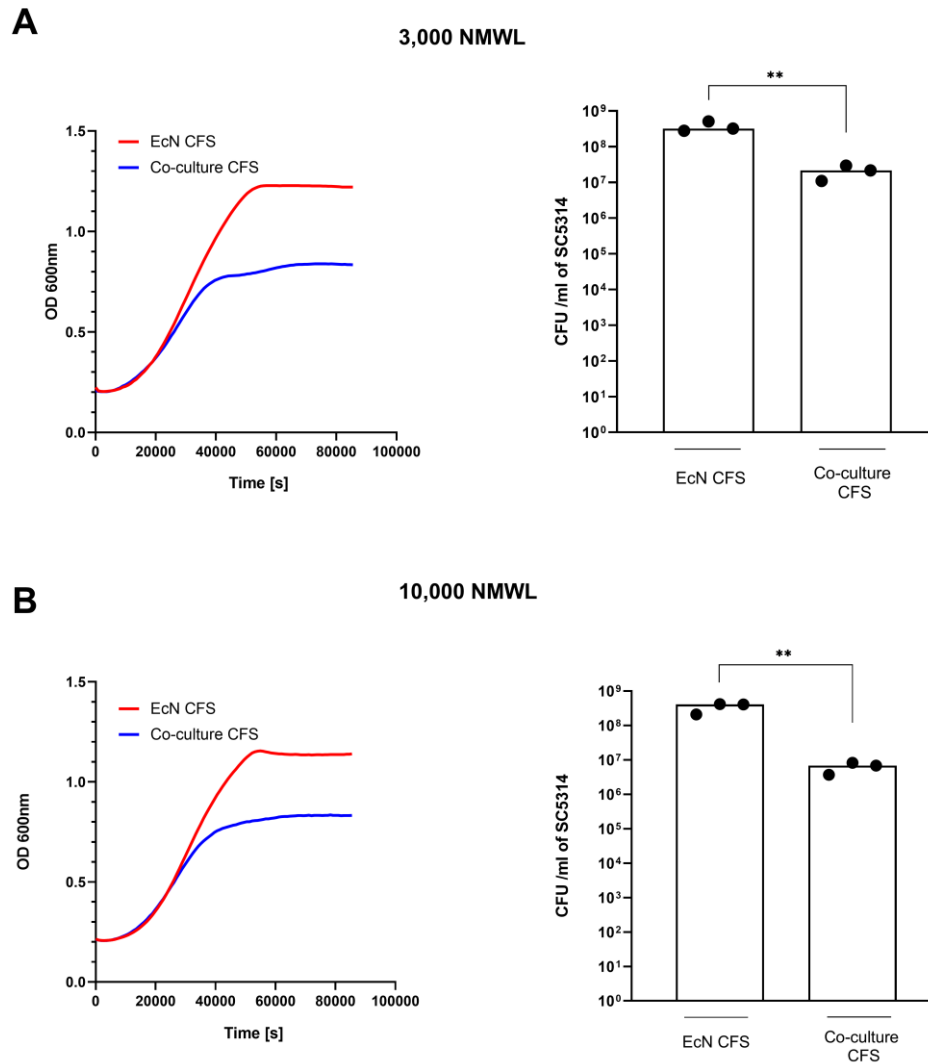

**Figure S1. The effect of Amicon Ultra-15 filter-processed CFS from EcN monoculture and EcN-*Ca* co-culture on *Ca.* growth.** (A) Left panel, EcN monoculture (EcN CFS, red curve) and EcN-*Ca* co-culture (co-culture CFS, blue curve) CFS were applied to 3,000 NMWL Amicon Ultra-15 filters then used as medium for monitoring growth of *Ca* (OD<sub>600nm</sub>, *y*-axis, *n* = 3, one representative curve is shown) as a function of time (seconds, *x*-axis). Right panel, the abundance of *Ca* in EcN monoculture CFS (ECN CFS) and in EcN-*Ca* co-culture CFS (Co-culture CFS) was also determined by counting colony-forming units per milliliter (CFU/mL, *y*-axis) on selective solid agar medium after 24 h of growth. (B) Left panel, EcN monoculture (EcN CFS, red curve) and EcN-*Ca* co-culture (co-culture CFS, blue curve) CFS were applied to 10,000 NMWL Amicon Ultra-15 filters then used as medium for monitoring growth of *Ca* (OD<sub>600nm</sub>, *y*-axis, *n* = 3) as a function of time (seconds, *x*-axis). Right panel, the abundance of *Ca* in EcN monoculture CFS (EcN CFS) and in EcN-*Ca* co-culture CFS (Co-culture CFS) was also determined by counting colony-forming units per milliliter (CFU/mL, *y*-axis) on selective solid agar medium after 24 h of growth. Statistical analyses were carried out using a two-tailed student *t* test comparing means of *Ca* abundance in EcN CFS versus co-culture CFS (Statistical significance: \*\*, *p*<0.01).

Figure S2

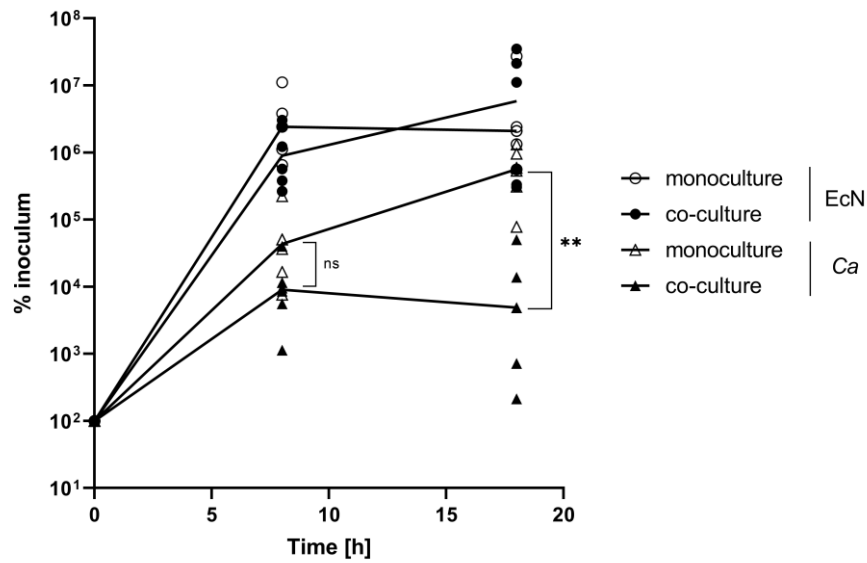

**Figure S2. The addition of magnesium to culture medium does not affect *Ca* growth inhibition by EcN.** Percent abundance of *Ca* relative to inoculum (% inoculum, *y*-axis, *i.e.* survival) as a function of time (hours, *x*-axis) grown in monoculture supplemented with 200  $\mu$ M MgSO<sub>4</sub> (EcN, open circles; *Ca*, open triangles) and in co-culture with EcN supplemented with 200  $\mu$ M MgSO<sub>4</sub> (EcN, filled circles; *Ca*, filled triangles) was determined by dividing CFU/mL values of each time point (0 h, 8 h and 18 h) by the CFU/mL value of time point 0 and multiplied by 100 (%). Data shown on the *y*-axis represent the mean values of the medians from n=6 independent experiments (*i.e.* performed on different days). Statistical analyses were carried out using a two-tailed Mann-Whitney test comparing monoculture and co-culture % inoculums for each species at time points 8 h and 18 h (ns, not significant ; \*\*,  $p < 0.01$ ).
